# Supplementary material
Source: publisher figshare collection journal article supplement (https://tandf.figshare.com/articles/dataset/_/21829490)
Supplement: Supplementary file 1 [file 1]

Stuart Turner

"Emigracyjny blues": perspektyw Wielkiej Brytanii oraz Europy.

W niniejszej pracy przedstawiamy sprawę uchodźców z perspektywy globalnej. Omawiamy politykę emigracyjną Wielkiej Brytanii, jak również pozostałych państw europejskich w kontekście historycznych uregulowań przepływu ludzi i wykazujemy, że dotychczasowe rozwiązania okazały się niezwykle mało skuteczne oraz nieprzystosowane do dotychczas największego kryzysu migracyjnego, jaki ma miejsce w obecnych czasach.

Name of translator: Marcin Rzeszutek, University of Finance and Management in Warsaw, Poland

**Citation:** European Journal of Psychotraumatology 2015, **6**: 29328 - <http://dx.doi.org/10.3402/ejpt.v6.29328>
