# Supplementary material
Source: publisher figshare collection journal article supplement (https://tandf.figshare.com/articles/dataset/_/21829490)
Supplement: Supplementary file 2 [file 1]

## **Title: La tristeza de los refugiados: Una perspectiva europea y del Reino Unido**

Stuart Turner

### **Abstract**

En este artículo, se pone en un contexto global la cantidad de refugiados que se desplazan a la Unión Europea. Se argumenta que el aumento de las restricciones a los que buscan asilo desde los años 80 en adelante en el Reino Unido y la cultura asociada de disuasión y prohibición han tenido el perverso efecto de apoyar al mercado económico del tráfico de personas. Parece que estas restricciones se diseñaron inicialmente para disuadir a la gente, a la mayoría de las cuales les hubiera otorgado ayuda humanitaria si hubiesen llegado al Reino Unido, para evitar que accediesen al proceso de toma de decisiones sobre asilo. Los cambios en la política en relación a los desplazamientos, los beneficios y otras presiones sobre los solicitantes de asilo también se tienen en cuenta dentro del contexto de la disuasión. Los problemas con los que se enfrentan los que buscan asilo no terminan cuando llegan a un país seguro. Los métodos actuales de determinar el estado de refugiado son alarmantemente débiles. De hecho, hay evidencia que sugiere que aquellos que están más traumatizados antes de llegar se enfrentan a desventajas sistemáticas. Este artículo se centra en el Reino Unido, pero sus conclusiones son aplicables a la mayoría de los países de Europa occidental. Este artículo concluye con algunas sugerencias tentativas para el cambio.

**Keywords:**

**Name of translator:** Miriam Ramos Morrison

European Journal of Psychotraumatology 2015, 6: 29328 - <http://dx.doi.org/10.3402/ejpt.v6.29328>
