# Supplementary material
Source: publisher figshare collection journal article supplement (https://tandf.figshare.com/articles/dataset/_/21829490)
Supplement: Supplementary file 3 [file 1]

## **Göçmen Bunalımı: Bir Birleşik Krallık ve Avrupa perspektifi**

Stuart Turner

### **Arkaplan**

Bu çalışmada, Avrupa Birliği'ne yolculuk yapan göçmenlerin sayısı küresel bağlamda ele alınmıştır. Birleşik Krallık'taki 1980lerden bu yana sığınma arayanlara yönelik artan kısıtlamaların yapıldığı ve alakalı caydırma ve yasaklama kültürünün insan kaçakçılığı için ekonomik piyasasını destekleyen ters bir etkisi olduğunu ileri sürülmektedir. Bu kısıtlamalar ilk başta insanları caydırmak için konulmuş gözükmekte olup, çoğu İngiltere'ye ulaşımı yönetmekte olan insani yardıma verilmiş olup, böylece sığınma için karar verme sürecine girmelerini engelleyecekti. Yolculukla ilişkili politika değişiklikleri, yararlar, ve sığınma arayan kişiler üzerindeki diğer baskılar caydırma bağlamında ele alınmıştır. Sığınma talebi olan insanların sorunları güvenli bir ülkeye ulaşmakla bitmemektedir. Göçmen statüsünü belirleyen şu anki yöntemler dikkat çekici şekilde zayıftır. Aslında ulaşmadan önce en çok travmatize olanların sistematik dezavantajı olduklarını öne süren kanıtlar bulunmaktadır. Bu çalışmanın odağı Birleşik Krallık olmasına rağmen sonuçlar çoğu Batı Avrupa ülkelerine de uygulanabilir durumdadır. Çalışma değişim için bazı deneme niteliğinde öneriler de sunmaktadır

Name of translator: Seray Akça

Citation: European Journal of Psychotraumatology 2015, 6: 29328 - <http://dx.doi.org/10.3402/ejpt.v6.29328>
